# Supplementary material
Source: ML conference proceedings conference paper supplement (https://proceedings.mlr.press/v161/loftin21a.html)
Supplement: Supplementary file [file loftin21a-supp.pdf]

## Appendix A Proof of Theorem 4.1

Our proof of regret bounds for Strategic ULCB is very similar to the proof for the regret bounds of Optimistic ULCB [Bai and Jin, 2020]. The key difference is that we need to show that the tighter confidence bounds maintained by Strategic ULCB still constrain the exploitability of the evaluation policies  $\tilde{\mu}^k$  and  $\tilde{\nu}^k$  (Lemma A.2), and that these confidence bounds still converge under our exploration policies. We also directly bound the  $L_1$  error of the transition model, which leads to a somewhat simpler proof, and helps us better understand the nature of the confidence sets that Strategic ULCB implicitly maintains.

**Lemma A.1.** *For a given  $K \geq 3$  and  $\delta > 0$ , define  $\beta_t$  as*

$$\beta_t = H \sqrt{\frac{2[|S| \ln(KH|S||A||B|/\delta)]}{t}} \quad (1)$$

*then with probability at least  $1 - \delta$ , for all  $k \in [K]$ ,  $h \in H$ ,  $s \in S_h$ ,  $a \in A_{h,s}$  and  $b \in B_{h,s}$ , and for all  $V \in [0, H]^{|S|}$ , we have*

$$\left| \hat{P}_h^k(s, a, b)^\top V - P(s, a, b)^\top V \right| \leq \beta_t \quad (2)$$

*for  $t = N_h^k(s, a, b)$ .*

*Proof.* When  $N_h^k(s, a, b) = 0$ , Equation 2 holds trivially as  $\beta_t = \infty$ . Otherwise, we can apply the well known bound on the  $L_1$  error of an empirical distribution due to Weissman et al. [2003] to show that

$$\Pr \left\{ \|\hat{P}_h^k(s, a, b) - P(s, a, b)\|_1 \geq \epsilon \right\} \leq (2^{|S|} - 2) \exp\{-N_h^k(s, a, b) \frac{\epsilon}{2}\} \quad (3)$$

Note that, for all  $V \in [0, H]^{|S|}$

$$|\hat{P}_h^k(s, a, b)^\top V - P(s, a, b)^\top V| \leq H \|\hat{P}_h^k(s, a, b) - P(s, a, b)\|_1 \quad (4)$$

and so for  $t = N_h^k(s, a, b)$  and  $\beta_t$  defined according to Equation 1 we have

$$\Pr \left\{ \exists V, |\hat{P}_h^k(s, a, b)^\top V - P(s, a, b)^\top V| \geq \beta_t \right\} \leq \frac{\delta}{KH|S||A||B|} \quad (5)$$

Taking the union bound over  $k, h, s, a$  and  $b$  yields the desired result.  $\square$

For games with deterministic transitions,  $\hat{P}_h^k(s, a, b) = P(s, a, b)$  whenever  $N_h^k(s, a, b) > 0$ , and so Equation 2 will hold even for  $\beta_t = 0$ , which is the value we use for our experiments in deterministic games. We can now show that our confidence bounds  $\bar{V}_h^k$  and  $\underline{V}_h^k$  not only constrain the value of the game at each state, but also bound the exploitability of our evaluation policies  $\tilde{\mu}^k$  and  $\tilde{\nu}^k$ .

**Lemma A.2.** *When Strategic-ULCB is run with  $\beta_t$  as defined in Equation 1, the for all  $k \in [K]$ ,  $h \in H$  and  $s \in S_h$ , we have*

$$\bar{V}_h^k(s) \geq \sup_{\mu} V_h^{\mu, \nu^k}(s) \quad (6)$$

$$\underline{V}_h^k(s) \leq \inf_{\nu} V_h^{\mu^k, \nu}(s) \quad (7)$$

with probability at least  $1 - \delta$ .

*Proof.* For each  $k \in [K]$  we prove this by induction on  $h$ . We will only show the proof for the upper bound, as the proof for the lower bound is symmetric. Assume that for some  $h \in [H]$  we have, for all  $s \in S_h$

$$\bar{V}_{h+1}^k(s) \geq \sup_{\mu} V_{h+1}^{\mu, \nu^k}(s) \quad (8)$$

By Lemma A.1, Equation 2 will hold simultaneously for all  $k, h, s, a$  and  $b$  with probability at least  $1 - \delta$ , and so when  $N_h^k(s, a, b) > 0$ , we have

$$\bar{Q}_h^k(s, a, b) = \hat{R}_h^k(s, a, b) + \hat{P}_h^k(s, a, b) \bar{V}_{h+1}^k + \beta_t \quad (9)$$

$$\geq R(s, a, b) + \hat{P}_h^k(s, a, b) \bar{V}_{h+1}^k \quad (10)$$

$$\geq R(s, a, b) + P(s, a, b) \sup_{\mu} V_{h+1}^{\mu, \nu^k} \quad (11)$$

$$= \sup_{\mu} Q_h^{\mu, \nu^k}(s, a, b) \quad (12)$$

where the  $t = N_h^k(s, a, b)$ , and the first inequality also uses the fact that  $\hat{R}_h^k(s, a, b) = R(s, a, b)$  when  $N_h^k(s, a, b) > 0$ . When  $N_h^k(s, a, b) = 0$ , Equation 9 holds trivially, as  $\bar{Q}_h^k(s, a, b) = H$ . By the definition of  $\bar{V}_{h+1}^k(s)$ , we then have

$$\bar{V}_{h+1}^k(s) - \sup_{\mu} V_h^{\mu, \nu^k}(s) = \mu_h^k(s)^\top \bar{Q}_h^k(s, \cdot, \cdot) \tilde{\nu}_h^k(s) \quad (13)$$

$$- \max_{a \in A_{h,s}} \sup_{\mu} Q_h^{\mu, \nu^k}(s, a, \cdot) \tilde{\nu}_h^k(s) \quad (14)$$

$$\geq \mu_h^k(s)^\top \bar{Q}_h^k(s, \cdot, \cdot) \tilde{\nu}_h^k(s) \quad (15)$$

$$- \max_{a \in A_{h,s}} \sup_{\mu} Q_h^k(s, a, \cdot) \tilde{\nu}_h^k(s) \quad (16)$$

$$= 0 \quad (17)$$

which proves the inductive step. The first inequality follows directly from Equation 9, while the second inequality follows from the fact that  $(\mu_h^k(s), \tilde{\nu}_h^k(s))$  for a Nash equilibrium of the matrix game defined by  $\bar{Q}_h^k(s, \cdot, \cdot)$ , and so  $\mu_h^k(s)$  is a best-response to  $\tilde{\nu}_h^k(s)$  under  $\bar{Q}_h^k(s, \cdot, \cdot)$ . Finally, we can see that Equation 8 holds trivially for  $h = H + 1$ , where we implicitly assume that  $\bar{V}_h^k(s) = \sup_{\mu} V_h^{\mu, \nu^k}(s) = 0$ , which concludes the proof.  $\square$

Lemma A.2 will be sufficient to prove Theorem 4.1 and bound the NashConv regret of the evaluation policies  $\tilde{\mu}^k$  and  $\tilde{\nu}^k$ . The remainder of the proof will closely follow the proof for Optimistic ULCB given by Bai and Jin [2020], with slight modifications to account for the presence of separate exploration and evaluation policies.

*Proof of Theorem 4.1.* We begin with the definition of the NashConv regret

$$\text{Regret}(K) = \sum_{k=1}^K \sup_{\mu} V_1^{\mu, \nu^k}(s_1) - \inf_{\nu} V_1^{\mu^k, \nu}(s_1) \quad (18)$$

for any  $k \in [K]$  and  $h \in [H]$ , we have

$$\sup_{\mu} V_h^{\mu, \nu^k}(s_h^k) - \inf_{\nu} V_h^{\mu^k, \nu}(s_h^k) \quad (19)$$

$$\leq \bar{V}_h^k(s_h^k) - V_h^k(s_h^k) \quad (20)$$

$$= \mu_h^k(s_h^k)^\top \bar{Q}_h^k(s_h^k, \cdot, \cdot) \tilde{\nu}_h^k(s_h^k) - \tilde{\mu}_h^k(s_h^k)^\top Q_h^k(s_h^k, \cdot, \cdot) \nu_h^k(s_h^k) \quad (21)$$

$$\leq \mu_h^k(s_h^k)^\top \bar{Q}_h^k(s_h^k, \cdot, \cdot) \nu_h^k(s_h^k) - \mu_h^k(s_h^k)^\top Q_h^k(s_h^k, \cdot, \cdot) \nu_h^k(s_h^k) \quad (22)$$

$$= \mu_h^k(s_h^k)^\top [\bar{Q}_h^k(s_h^k, \cdot, \cdot) - \underline{Q}_h^k(s_h^k, \cdot, \cdot)] \nu_h^k(s_h^k) \quad (23)$$

where the first inequality follows from Lemma A.2, while the second follow from the fact that  $\tilde{\mu}^k$  and  $\tilde{\nu}^k$  are best responses, and so changing to the optimistic strategies  $\mu^k$  and  $\nu^k$  can only increase the width of the confidence interval. We can decompose the last term as

$$\mu_h^k(s_h^k)^\top [\bar{Q}_h^k(s_h^k, \cdot, \cdot) - \underline{Q}_h^k(s_h^k, \cdot, \cdot)] \nu_h^k(s_h^k) \quad (24)$$

$$= [\bar{Q}_h^k - \underline{Q}_h^k](s_h^k, a_h^k, b_h^k) + \xi_h^k \quad (25)$$

$$= \hat{P}_h^k(s_h^k, a_h^k, b_h^k)^\top [\bar{V}_{h+1}^k - V_{h+1}^k] + 2\beta_h^k + \xi_h^k \quad (26)$$

$$= P(s_h^k, a_h^k, b_h^k)^\top [\bar{V}_h^k - V_h^k] + 4\beta_h^k + \xi_h^k \quad (27)$$

$$= [\bar{V}_{h+1}^k - V_{h+1}^k](s_{h+1}^k) + \zeta_h^k + 4\beta_h^k + \xi_h^k \quad (28)$$

where  $\beta_h^k = \beta_t$  for  $t = N_h^k(s, a, b)$ . The terms  $\xi_h^k$  and  $\zeta_h^k$  are defined as

$$\xi_h^k = \mathbb{E}_{a, b \sim \mu_h^k(s_h^k), \nu_h^k(s_h^k)} [\bar{Q}_h^k - \underline{Q}_h^k](s_h^k, a, b) \quad (29)$$

$$- [\bar{Q}_h^k - \underline{Q}_h^k](s_h^k, a_h^k, b_h^k) \quad (30)$$

$$\zeta_h^k = \mathbb{E}_{s \sim P(s_h^k, a_h^k, b_h^k)} [\bar{V}_{h+1}^k - V_{h+1}^k](s) \quad (31)$$

$$- [\bar{V}_{h+1}^k - V_{h+1}^k](s_{h+1}^k) \quad (32)$$

$$(33)$$

Here  $\xi_h^k$  and  $\zeta_h^k$  are not i.i.d., but the sequences of their partial sums over  $k$  and

$h$  are martingales, and so by the Azuma-Hoeffding inequality

$$\sum_{k=1}^K \sum_{h=1}^H \xi_h^k \leq \sqrt{2KH^3 \ln \frac{1}{\delta}} \quad (34)$$

$$\sum_{k=1}^K \sum_{h=1}^H \zeta_h^k \leq \sqrt{2KH^3 \ln \frac{1}{\delta}} \quad (35)$$

we then have

$$\sum_{k=1}^K \sup_{\mu} V_1^{\mu, \nu^k}(s_1) - \inf_{\nu} V_1^{\mu^k, \nu}(s_1) \quad (36)$$

$$\leq \sum_{k=1}^K [\bar{V}_h^k(s_1^k) - V_1^k(s_1^k)] \quad (37)$$

$$\leq \sum_{k=1}^K \sum_{h=1}^H [4\beta_h^k + \xi_h^k + \zeta_h^k] \quad (38)$$

For  $\beta_h^k$  we have

$$\sum_{k=1}^K \sum_{h=1}^H \beta_h^k = C \sum_{h=1}^H \sum_{s \in S_h} \sum_{a \in A_{h,s}} \sum_{b \in B_{h,s}} \sum_{t=1}^{N_h^K(s,a,b)} \frac{1}{\sqrt{t}} \quad (39)$$

$$\leq \sqrt{KH^2 |S| |A| |B|} \quad (40)$$

by the Cauchy-Schwarz inequality, where

$$C = \sqrt{2H^2 |S| \ln(KH |S| |A| |B| / \delta)} \quad (41)$$

finally, this gives us

$$\sum_{k=1}^K \sum_{h=1}^H [4\beta_h^k + \xi_h^k + \zeta_h^k] \quad (42)$$

$$\leq 4\sqrt{2KH^4 |S|^2 |A| |B| \ln(KH |S| |A| |B| / \delta)} + 2\sqrt{2KH^3 \ln \frac{1}{\delta}} \quad (43)$$

$$\leq 6\sqrt{2KH^4 |S|^2 |A| |B| \ln(KH |S| |A| |B| / \delta)} \quad (44)$$

which completes the proof.  $\square$

## Appendix B Proof of Theorem 4.2

We prove Theorem 4.2 for the max-player's exploration strategy  $\mu^k$  only, as the proof for the min-player's strategy is symmetric. We first show that the upper bounds  $\bar{V}_h^k$  and  $\bar{Q}_h^k$  can always be achieved for some game in  $D_k$ .

**Lemma B.1.** *At each episode  $k$ , there exists a game  $G \in D_k$  such that the upper confidence bounds  $\bar{V}^k$  and  $\bar{Q}_h^k$  computed by Strategic-ULCB for  $\beta_t = 0$  satisfy*

$$\bar{V}_h^k(s) = \sup_{\mu} \inf_{\nu} V_{G,h}^{\mu,\nu}(s) \quad (45)$$

$$\bar{Q}_h^k(s, a, b) = \sup_{\mu} \inf_{\nu} Q_{G,h}^{\mu,\nu}(s, a, b) \quad (46)$$

for all  $h \in [H]$  and  $s \in S_h$ , and  $a \in A_{h,s}$  or  $b \in B_{h,s}$ .

*Proof.* We prove this by induction on  $h$ . Assume that for some  $k \geq 1$ ,  $h \in [H]$ , there exists a game  $G \in D_k$  such that

$$\bar{V}_{h+1}^k(s) = \sup_{\mu} \inf_{\nu} V_{G,h+1}^{\mu,\nu}(s) \quad (47)$$

for all  $s \in S_{h+1}$ . For each  $s \in S_h$ ,  $a \in A_{h,s}$ , and  $b \in B_{h,s}$ , if  $(h, s, a, b) \in \mathcal{H}_t$ , then since  $G \in D^k$  we will have  $\hat{R}_h^k(s, a, b) = R_{G,h}(s, a, b) = R_h(s, a, b)$  and  $\hat{P}_h^k(s, a, b) = P_{G,h}(s, a, b) = P_h(s, a, b)$ , and so

$$\bar{Q}_h^k(s, a, b) = R_{G,h}(s, a, b) + P_{G,h}(s, a, b)^\top \bar{V}_{G,h+1}^k \quad (48)$$

$$= \sup_{\mu} \inf_{\nu} Q_{G,h}^{\mu,\nu}(s, a, b) \quad (49)$$

On the other hand, if  $(h, s, a, b) \notin \mathcal{H}_t$ , then we have  $\bar{Q}_h^k(s, a, b) = H$ . In this case, there exists a game  $G' \in D^k$  that is equivalent to  $G$  for all  $h' \geq h$ , but for which  $P_{G',h}(s, a, b, s^*) = 1$ , and  $R_h(s, a, b) = H$ , where  $s^*$  is our hypothetical absorbing state with reward 0 for all actions and time steps. Because transition distributions can be selected independently of one another for each  $s, a$  and  $b$ , there exists  $G' \in D_k$  such that  $P_{G',h}(s, a, b, s^*) = 1$ , and  $R_h(s, a, b) = H$  for all  $s \in S_h$ ,  $a \in A_{h,s}$ , and  $b \in B_{h,s}$  where  $(h, s, a, b) \notin \langle t$ , such that  $\bar{Q}_h^k(s, a, b) = \sup_{\mu} \inf_{\nu} Q_{G',h}^{\mu,\nu}(s, a, b)$ . We then have that

$$\bar{V}_h^k(s) = \mu_h^k(s)^\top \bar{Q}_h^k(s, \cdot, \cdot) \tilde{\nu}_h^k(s) \quad (50)$$

$$= \sup_{\mu} \inf_{\nu} \bar{Q}_h^k(s, \cdot, \cdot) \quad (51)$$

$$= \sup_{\mu} \inf_{\nu} \bar{Q}_{G',h}^k(s, \cdot, \cdot) \quad (52)$$

Noting that Equation 47 holds trivially for  $h = H$ , where we implicitly assume that  $\bar{V}_{H+1}^k = V_{H+1}^{\mu,\nu} = 0$ , this proves the lemma for all  $h \in H$ .  $\square$

To show that Strategic ULCB is strategically efficient for the max-player exploration policy, we need to show that, for some game  $G \in D_k$ ,  $\mu^k$  is the max player component of a Nash equilibrium of  $G$ .

*Proof of Theorem 4.2.* Let  $G \in D_k$  be a game for which Equations 45 and 46 hold. By Lemma B.1, such a game always exists. We can prove that  $\mu^k$  is a

max-player component of an equilibrium of  $G$  by induction on  $h$ . Assume that, for  $h \in [H]$  and for all  $s \in S_h$

$$\mu^k \in \arg \max_{\mu} \inf_{\nu} V_{G,h+1}^{\mu,\nu}(s) \quad (53)$$

We then have that, for all  $h \in H$ ,  $s \in S_h$

$$\mu_h^k(s) \in \arg \max_x \inf_y x^\top \bar{Q}_h^k(s, \cdot, \cdot) y \quad (54)$$

$$= \arg \max_x \inf_y x^\top \left[ \sup_{\mu} \inf_{\nu} Q_{G,h}^{\mu,\nu}(s, \cdot, \cdot) \right] y \quad (55)$$

$$= \arg \max_x x^\top \left[ \sup_{\mu} \inf_{\nu} Q_{G,h}^{\mu,\nu}(s, \cdot, \cdot) \nu_h(s) \right] \quad (56)$$

$$= \arg \max_x x^\top \inf_{\nu} V_{G,h+1}^{\mu^k,\nu}(s) \quad (57)$$

where the last line implies that

$$\mu^k \in \arg \max_{\mu} \inf_{\nu} V_{G,h}^{\mu,\nu}(s) \quad (58)$$

Noting that Equation 53 is implicitly satisfied for  $h = H$ , this concludes the proof for  $\mu^k$ . Repeating this process for  $\nu^k$  proves the result.  $\square$

## Appendix C Optimistic Nash-Q Algorithm

Algorithm 1 describes Optimistic Nash-Q algorithm of Bai et al. [2020]. Note that, in our implementation, the evaluation strategies are taken as the marginals of the most recent exploration strategy, which is itself a joint distribution over the actions for both players. Here, the sequences of learning rates  $\alpha_t$  and exploration bonuses  $\beta_t$  are left as free hyperparameters that can be tuned to a specific task.

## Appendix D Strategic Nash-Q Algorithm

Algorithm 2 describes the Strategic Nash-Q algorithm, which applies the strategically efficient updater rules of Strategic ULCB to the Optimistic Nash-Q algorithm of Bai et al. [2020]. Here, the sequences of learning rates  $\alpha_t$  and exploration bonuses  $\beta_t$  are left as free hyperparameters that can be tuned to a specific task.

## References

Yu Bai and Chi Jin. Provable self-play algorithms for competitive reinforcement learning. In *International Conference on Machine Learning*, pages 551–560. PMLR, 2020.

---

**Algorithm 1** The Optimistic Nash-Q algorithm. Optimistic Nash-Q maintains upper and lower bounds on the optimal Q-function, and selects as its exploration strategy a *Coarse Correlated Equilibrium* (CCE) of the corresponding general-sum game for each state.

---

**Inputs:**  $\alpha_{t \geq 0}, \beta_{t \geq 0}$   
**Initialize:**  $\forall (h, s, a, b), \bar{Q}_h(s, a, b), \bar{V}_h(s) \leftarrow H, \underline{Q}_h(s, a, b), \underline{V}_h(s) \leftarrow 0,$   
 $N_h(s, a, b) \leftarrow 0, \pi_h^1(s, a, b) \leftarrow 1/|A_{h,s}||B_{h,s}|.$   
**for** episode  $k = 1, \dots, K$  **do**  
  observe  $s_1^k.$   
  **for** step  $h = 1, \dots, H$  **do**  
    take action  $a_h^k \sim \mu_h^k(s_h^k), b_h^k \sim \nu_h^k(s_h^k).$   
    observe reward  $r_h^k,$  next state  $s_{h+1}^k.$   
     $N_h(s_h^k, a_h^k, b_h^k) \leftarrow N_h(s_h^k, a_h^k, b_h^k) + 1$   
     $t \leftarrow N_h(s_h^k, a_h^k, b_h^k)$   
     $\bar{Q}_h(s_h^k, a_h^k, b_h^k) \leftarrow \min\{(1-\alpha_t)\bar{Q}_h(s_h^k, a_h^k, b_h^k) + \alpha_t(r_h^k + \bar{V}_{h+1}^k(s_{h+1}^k) + \beta_t), H\}$   
     $\underline{Q}_h(s_h^k, a_h^k, b_h^k) \leftarrow \max\{(1-\alpha_t)\underline{Q}_h(s_h^k, a_h^k, b_h^k) + \alpha_t(r_h^k + \underline{V}_{h+1}^k(s_{h+1}^k) - \beta_t), 0\}$   
     $\pi_h^{k+1}(s_h^k) \leftarrow \text{CCE}(\bar{Q}_h(s_h^k, \cdot, \cdot), -\underline{Q}_h(s_h^k, \cdot, \cdot))$   
     $\bar{V}_h(s_h^k) \leftarrow \sum_{a \in A, b \in B} \pi_h^{k+1}(s_h^k, a, b) \bar{Q}_h(s_h^k, a, b)$   
     $\underline{V}_h(s_h^k) \leftarrow \sum_{a \in A, b \in B} \pi_h^{k+1}(s_h^k, a, b) \underline{Q}_h(s_h^k, a, b)$   
     $\tilde{\mu}_h^{k+1}(s_h^k) \leftarrow \sum_{b \in B} \pi_h^{k+1}(s_h^k, \cdot, b)$   
     $\tilde{\nu}_h^{k+1}(s_h^k) \leftarrow \sum_{a \in A} \pi_h^{k+1}(s_h^k, a, \cdot)$   
  **end for**  
**end for**

---

Yu Bai, Chi Jin, and Tiancheng Yu. Near-optimal reinforcement learning with self-play. *Advances in Neural Information Processing Systems*, 33, 2020.

Tsachy Weissman, Erik Ordentlich, Gadiel Seroussi, Sergio Verdu, and Marcelo J Weinberger. Inequalities for the l1 deviation of the empirical distribution. *Hewlett-Packard Labs, Tech. Rep*, 2003.

---

**Algorithm 2** The Strategic Nash-Q algorithm. Unlike Optimistic Nash-Q, Strategic Nash-Q computes the max and min-player policies for each state independently, and updates its value function bounds under the assumption that the adversary acts pessimistically (optimizing the lower-bound on its expected return, rather than the upper bound). Like Strategic ULCB, Strategic Nash-Q maintains separate evaluation policies  $\tilde{\mu}^k$  and  $\tilde{\nu}^k$ .

---

**Inputs:**  $\alpha_{t \geq 0}, \beta_{t \geq 0}$   
**Initialize:**  $\forall (h, s, a, b), \bar{Q}_h(s, a, b) \leftarrow H, \underline{Q}_h(s, a, b) \leftarrow 0, N_h(s, a, b) \leftarrow 0,$   
 $\mu_h^1(s, a) \leftarrow 1/|A_{h,s}|, \nu_h^1(s, a) \leftarrow 1/|B_{h,s}|.$   
**for** episode  $k = 1, \dots, K$  **do**  
  observe  $s_1^k$ .  
  **for** step  $h = 1, \dots, H$  **do**  
    take action  $a_h^k \sim \mu_h^k(s_h^k), b_h^k \sim \nu_h^k(s_h^k)$ .  
    observe reward  $r_h^k$ , next state  $s_{h+1}^k$ .  
     $N_h(s_h^k, a_h^k, b_h^k) \leftarrow N_h(s_h^k, a_h^k, b_h^k) + 1$   
     $t \leftarrow N_h(s_h^k, a_h^k, b_h^k)$   
     $\bar{Q}_h(s_h^k, a_h^k, b_h^k) \leftarrow \min\{(1-\alpha_t)\bar{Q}_h(s_h^k, a_h^k, b_h^k) + \alpha_t(r_h^k + \bar{V}_{h+1}^k(s_{h+1}^k) + \beta_t), H\}$   
     $\underline{Q}_h(s_h^k, a_h^k, b_h^k) \leftarrow \max\{(1-\alpha_t)\underline{Q}_h(s_h^k, a_h^k, b_h^k) + \alpha_t(r_h^k + \underline{V}_{h+1}^k(s_{h+1}^k) - \beta_t), 0\}$   
     $\mu_h^{k+1}(s_h^k), \tilde{\nu}_h^{k+1}(s_h^k) \leftarrow \text{Nash}(\bar{Q}_h(s_h^k, \cdot, \cdot), -\bar{Q}_h(s_h^k, \cdot, \cdot))$   
     $\tilde{\mu}_h^{k+1}(s_h^k), \nu_h^{k+1}(s_h^k) \leftarrow \text{Nash}(\underline{Q}_h(s_h^k, \cdot, \cdot), -\underline{Q}_h(s_h^k, \cdot, \cdot))$   
     $\bar{V}_h^k(s) \leftarrow \mu_h^k(s)^\top \bar{Q}_h^k(s, \cdot, \cdot) \tilde{\nu}_h^k$   
     $\underline{V}_h^k(s) \leftarrow \tilde{\mu}_h^k(s)^\top \underline{Q}_h^k(s, \cdot, \cdot) \nu_h^k$   
  **end for**  
**end for**

---
